# Supplementary material for: Production Assessment and Genome Comparison Revealed High Yield Potential and Novel Specific Alleles Associated with Fertility and Yield in Neo-Tetraploid Rice
Source: PubMed Central journal article supplement (PMC7271338; doi:10.1186/s12284-020-00387-3), 2020-06-03
Supplement: 12284_2020_387_MOESM1_ESM.pdf [file 12284_2020_387_MOESM1_ESM.pdf]

**Additional file 1**

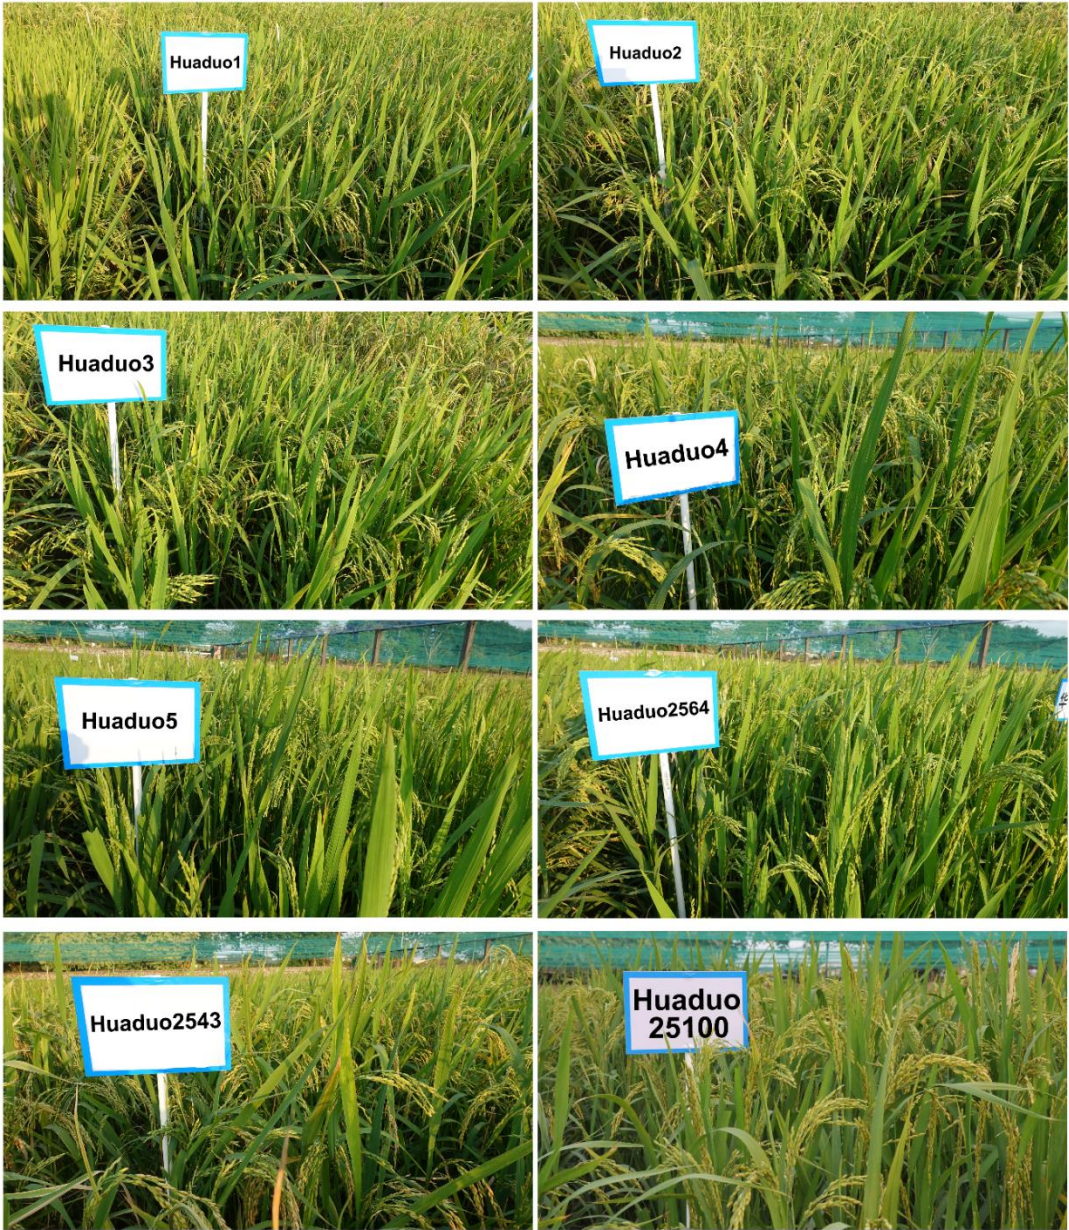

**Figure S1a** The performance of 15 neo-tetraploid rice (NTR) lines in field experiments.

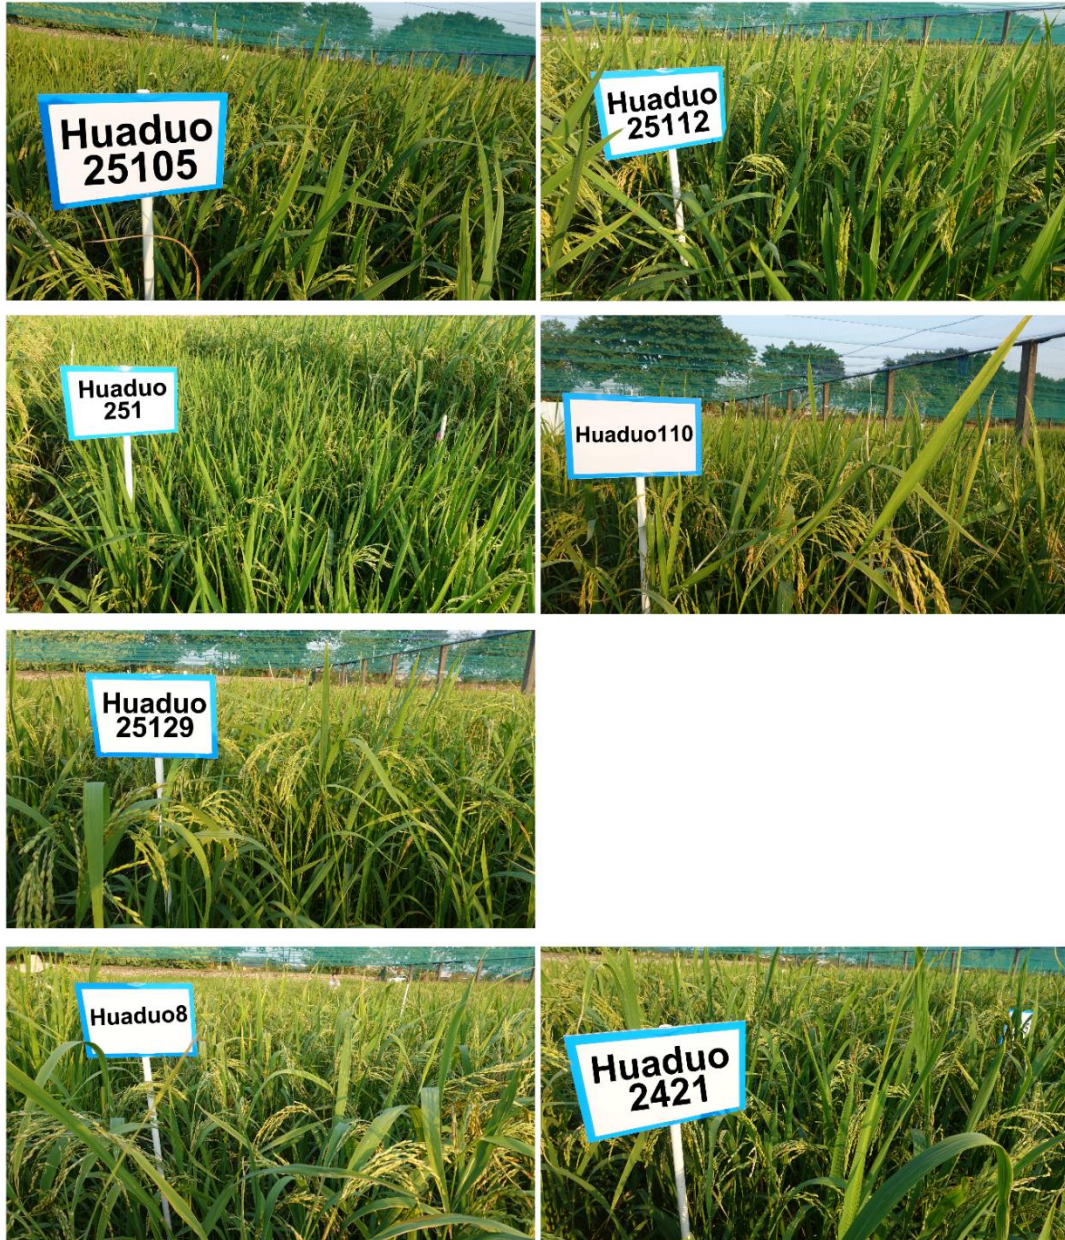

**Figure S1b** The performance of 15 neo-tetraploid rice (NTR) lines in field experiments.

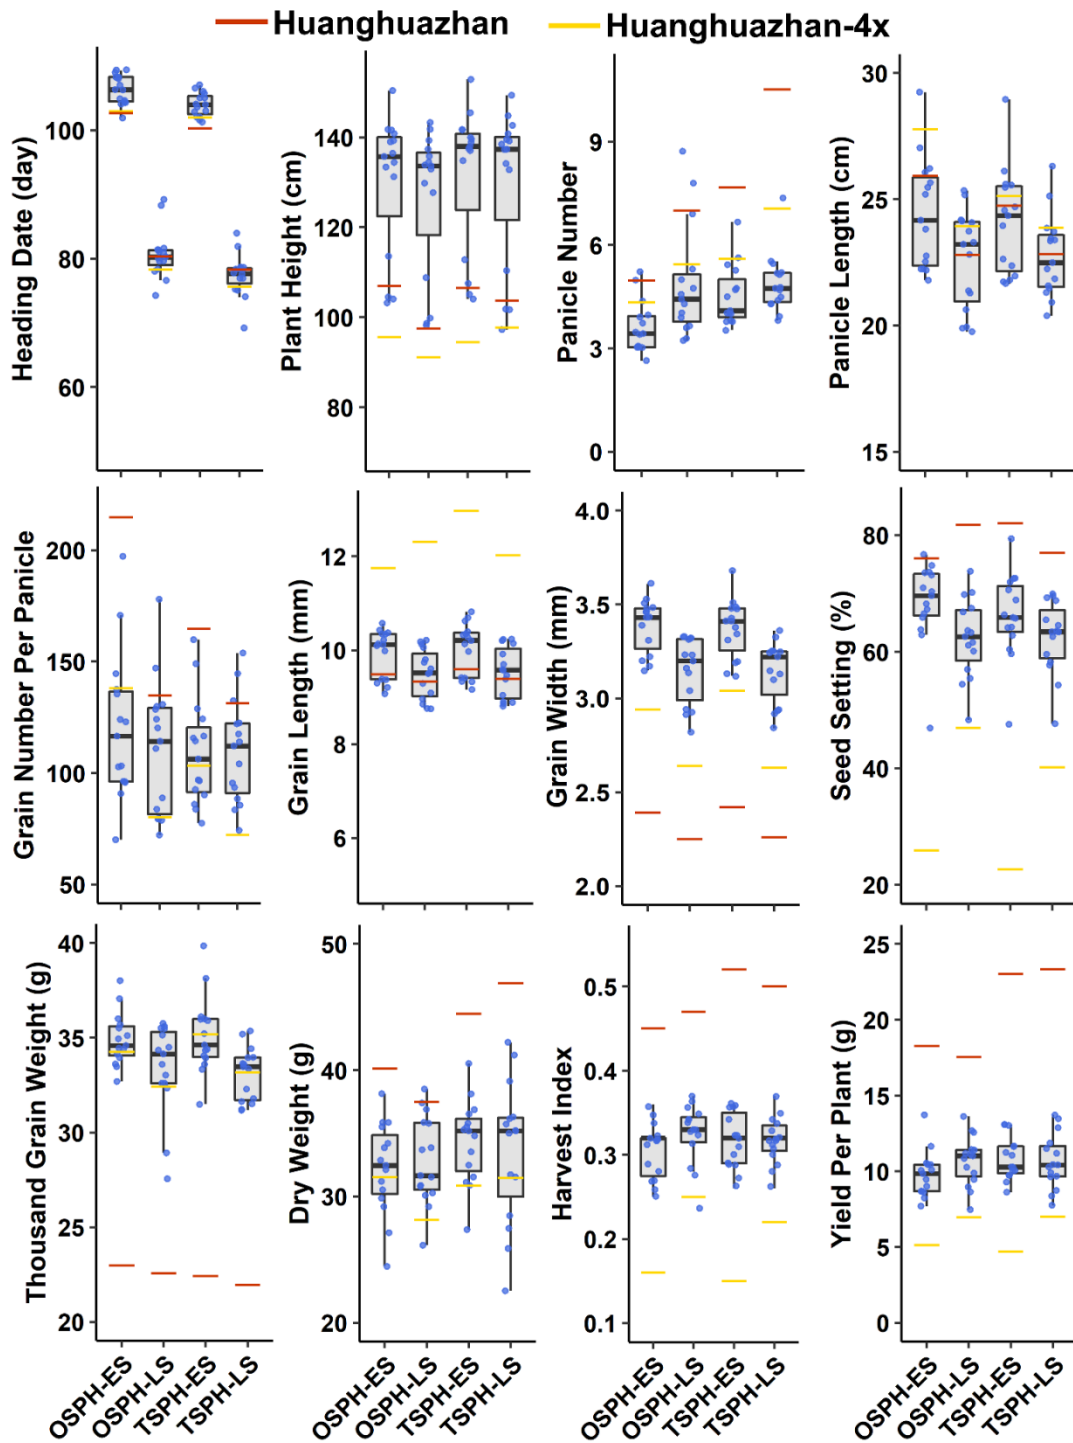

**Figure S2** Yield performance and production assessment of neo-tetraploid rice lines compared with Huanghuazhan and Huanghuazhan-4x.

The average values of traits with three replications were used. OSPH, one seedling per hole; TSPH, three seedlings per hole; ES, early season; LS, late season. The blue dots indicate the values of traits of neo-tetraploid rice lines.

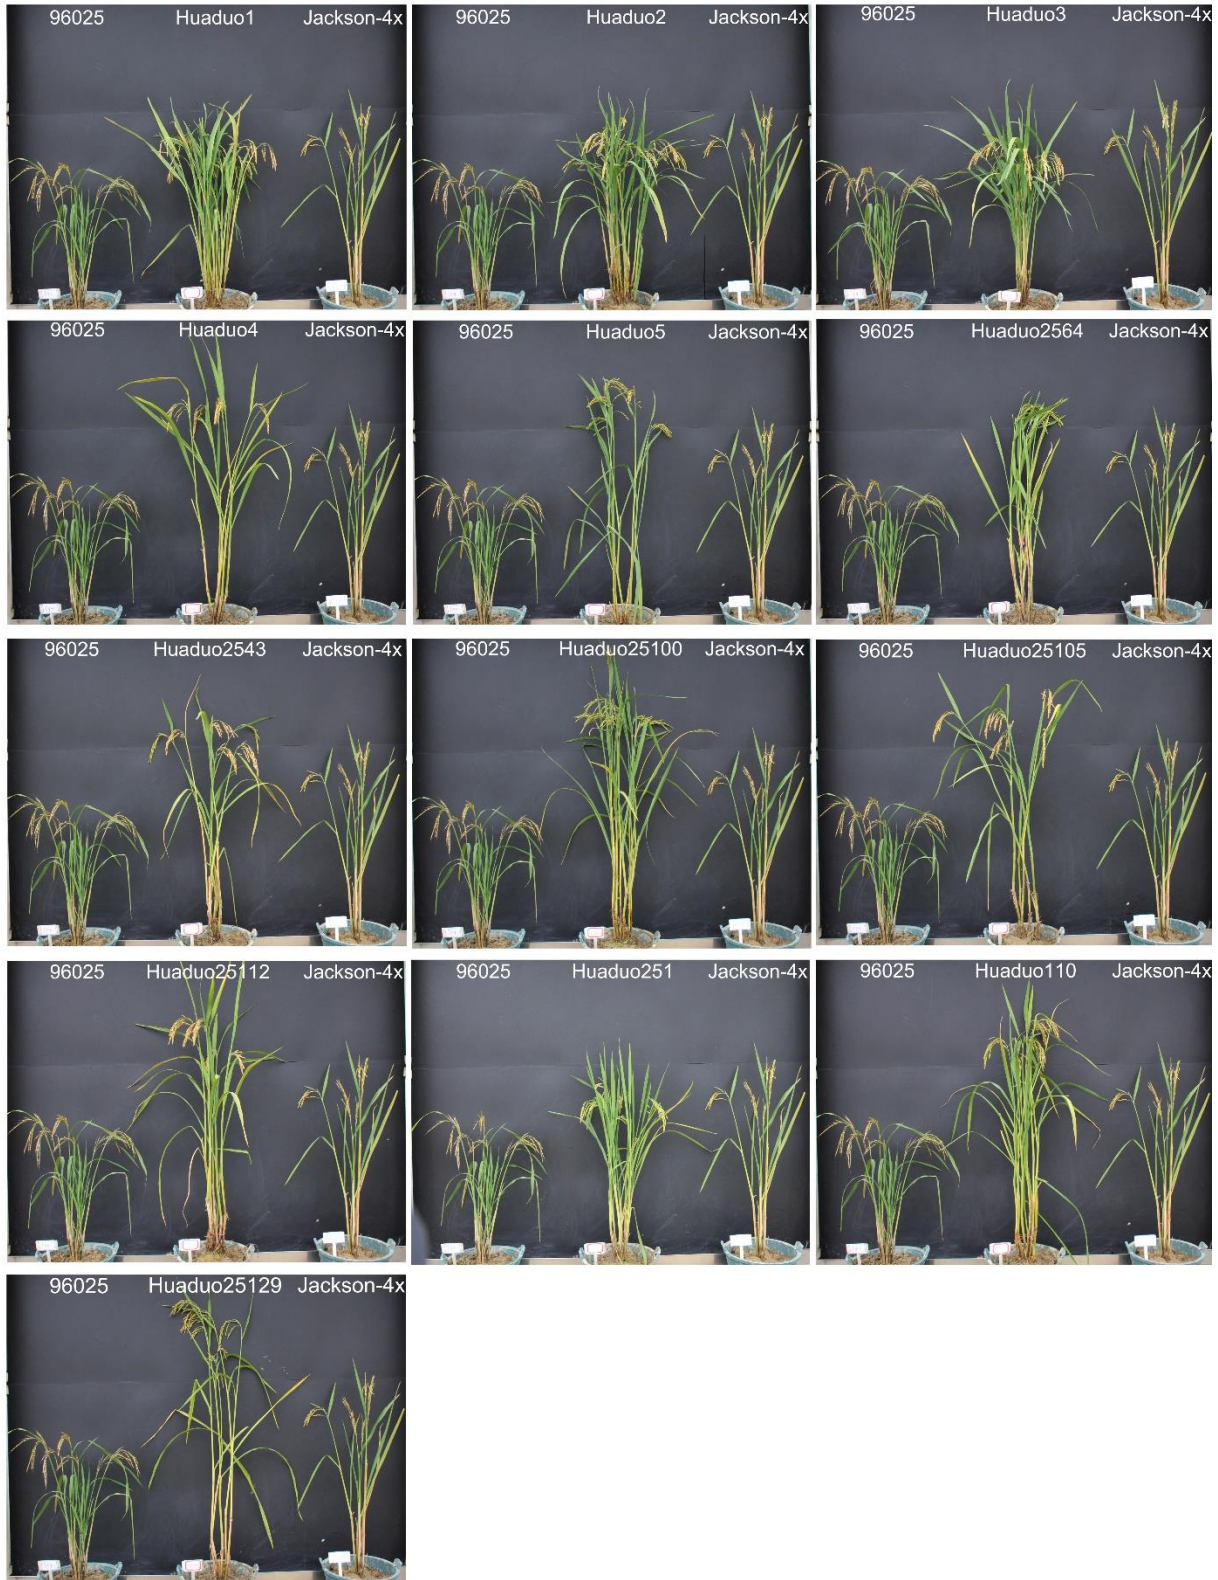

**Figure S3** Plant morphology of 13 NTRs and their parental lines.

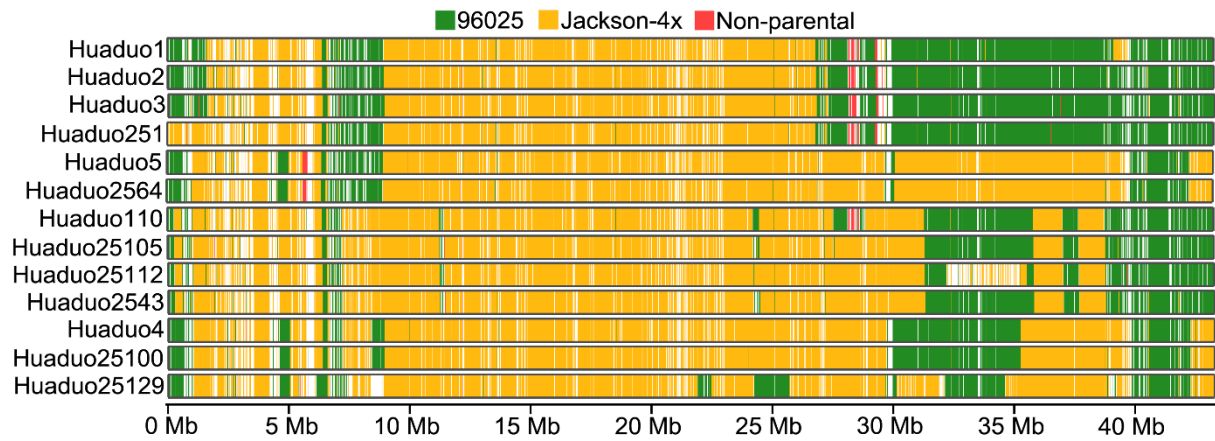

**Figure S4a** Inherited blocks inference in chromosome 1 of 13 NTRs lines that developed from 96025 and Jackson-4x.

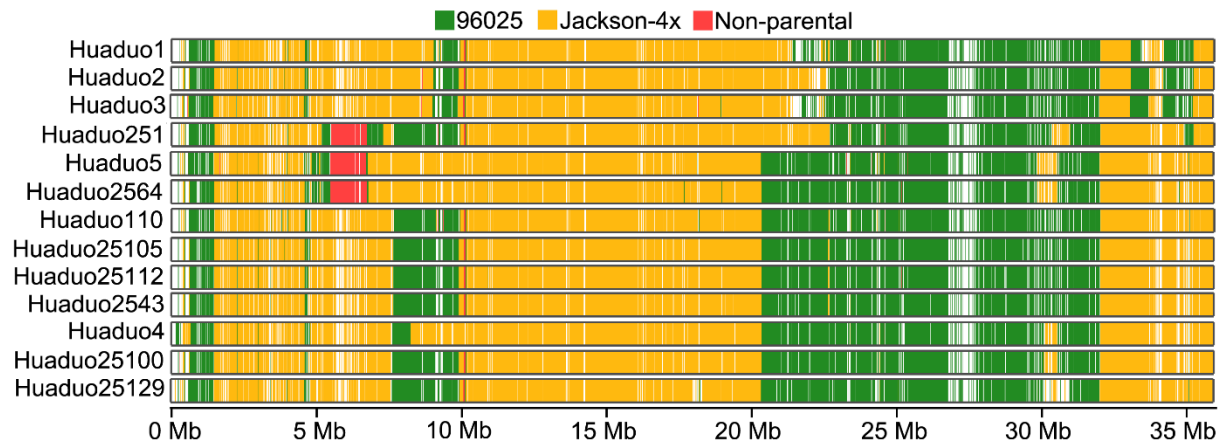

**Figure S4b** Inherited blocks inference in chromosome 2 of 13 NTRs lines that developed from 96025 and Jackson-4x.

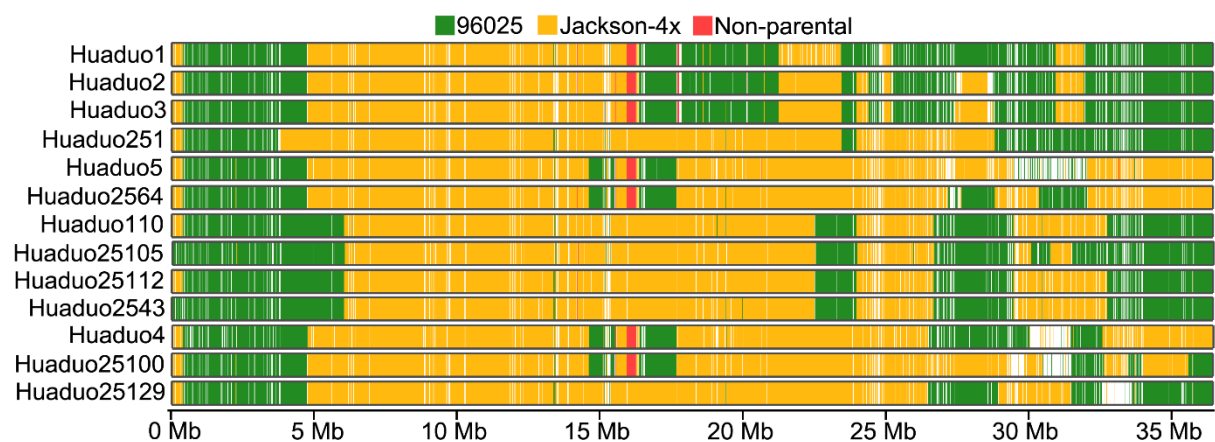

**Figure S4c** Inherited blocks inference in chromosome 3 of 13 NTRs lines that developed from 96025 and Jackson-4x.

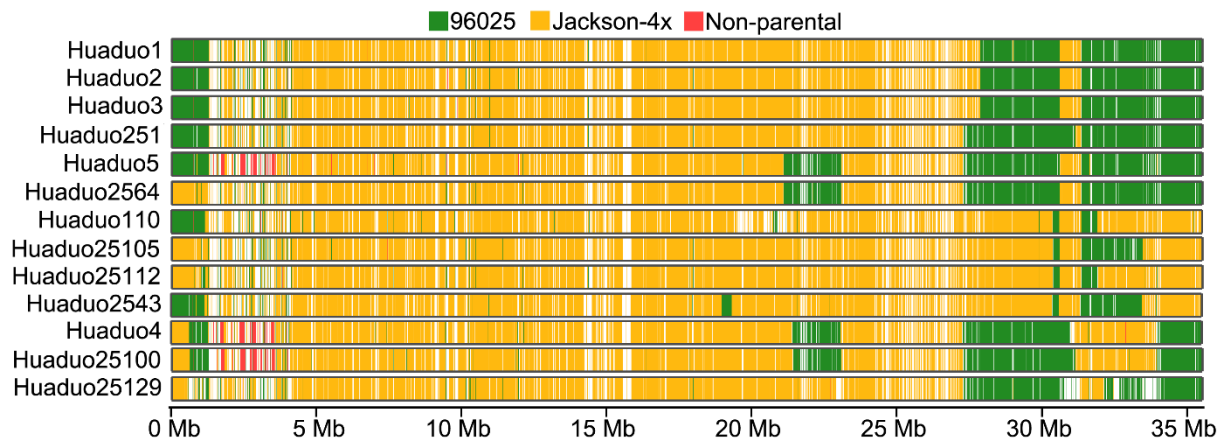

**Figure S4d** Inherited blocks inference in chromosome 4 of 13 NTRs lines that developed from 96025 and Jackson-4x.

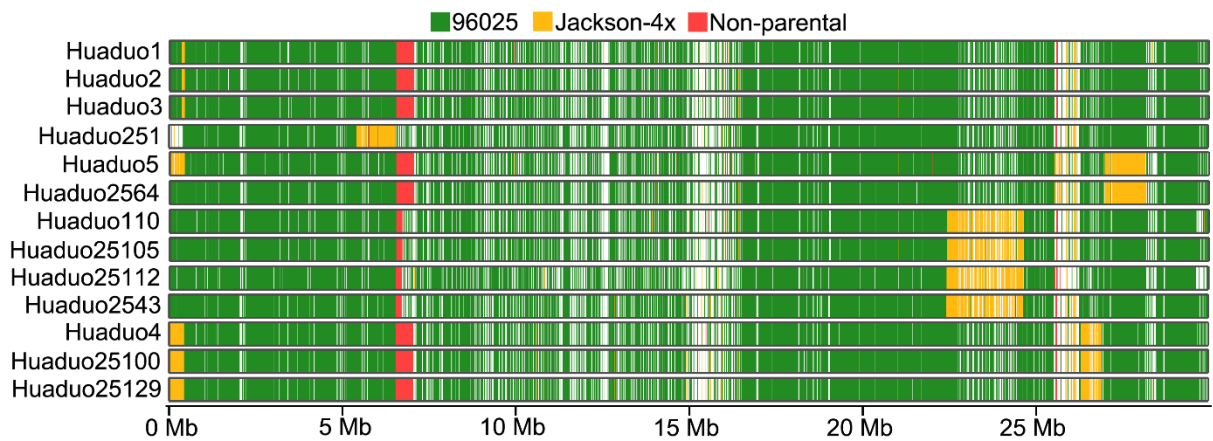

**Figure S4e** Inherited blocks inference in chromosome 5 of 13 NTRs lines that developed from 96025 and Jackson-4x.

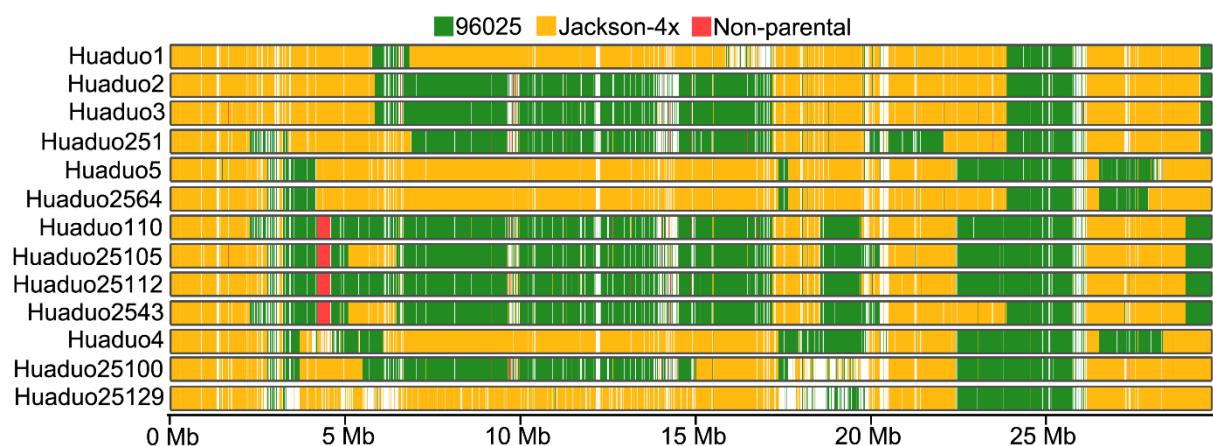

**Figure S4f** Inherited blocks inference in chromosome 7 of 13 NTRs lines that developed from 96025 and Jackson-4x.

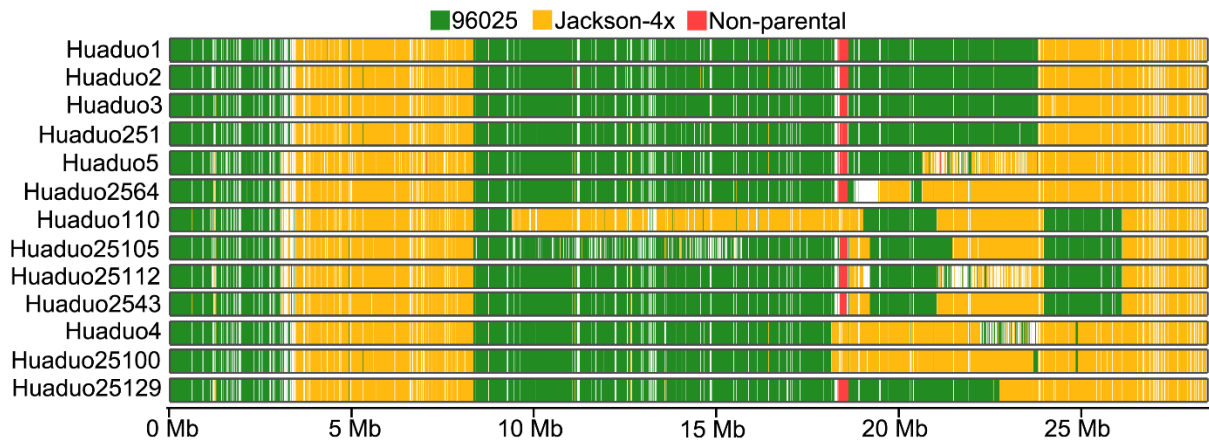

**Figure S4g** Inherited blocks inference in chromosome 8 of 13 NTRs lines that developed from 96025 and Jackson-4x.

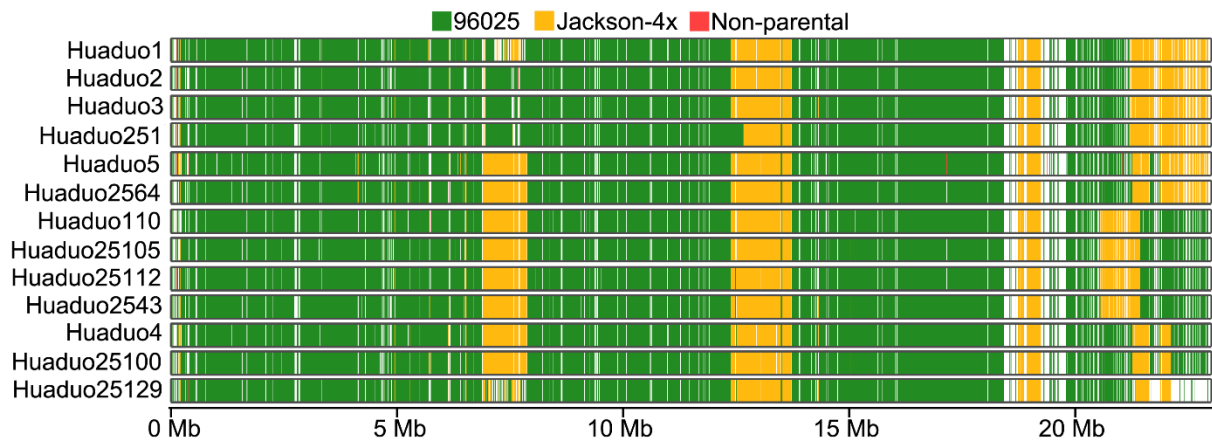

**Figure S4h** Inherited blocks inference in chromosome 9 of 13 NTRs lines that developed from 96025 and Jackson-4x.

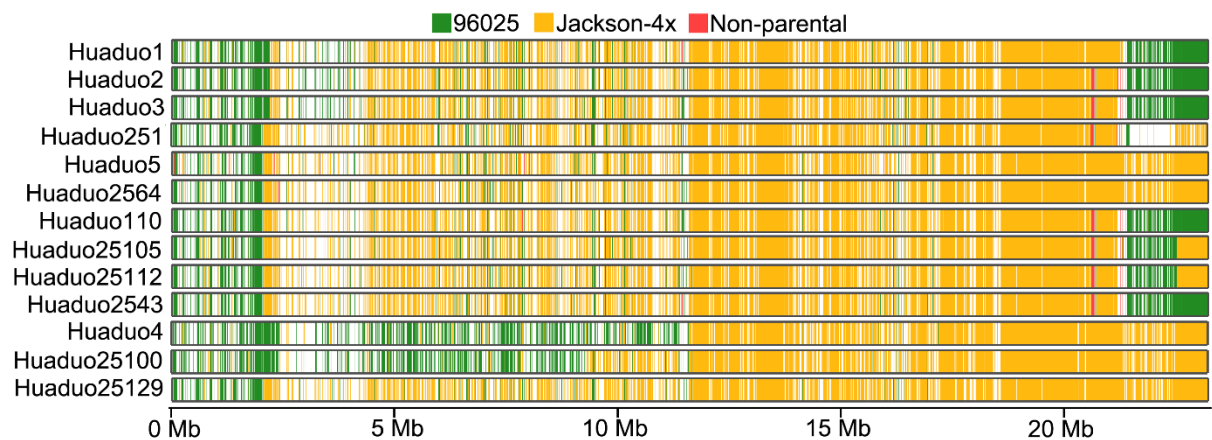

**Figure S4i** Inherited blocks inference in chromosome 10 of 13 NTRs lines that developed from 96025 and Jackson-4x.

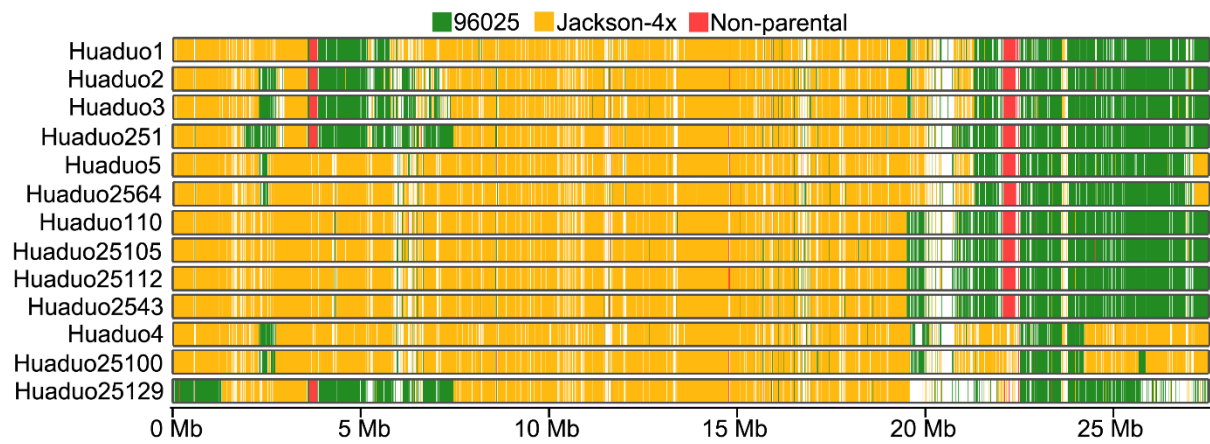

**Figure S4j** Inherited blocks inference in chromosome 12 of 13 NTRs lines that developed from 96025 and Jackson-4x.
